# Supplementary material for: Tetra-substituted phthalocyanines bearing thiazolidine derivatives: synthesis, anticancer activity on different cancer cell lines, and molecular docking studies
Source: Royal Society of Chemistry journal article supplement (doi:10.1039/d1dt02023d), 2021-01-01
Supplement: d1dt02023d1.pdf [file d1dt02023d1.pdf]

# Tetra-Substituted Phthalocyanines Bearing Thiazolidine Derivative: Synthesis, Anticancer Activity on Different Cancer Cell Lines, and Molecular Docking Studies

Ahmet T. Bilgiçli<sup>a\*</sup>, Ceylan Hepokur<sup>b</sup>, Hayriye Genc Bilgiçli<sup>a</sup>, Burak Tüzün<sup>c</sup>,  
Armağan Günsel<sup>a</sup>, Sema Mısıır<sup>b</sup>, Mustafa Zengin<sup>a</sup>, M. Nilüfer Yarasır<sup>a</sup>

<sup>a</sup>Department of Chemistry, Sakarya University, 54140, Esentepe, Sakarya, Turkey

<sup>b</sup>Cumhuriyet University, Faculty of Pharmacy, Department of Basic Pharmaceutical Sciences, Division of Biochemistry, Sivas, Turkey

<sup>c</sup>Plant and Animal Production Department, Technical Sciences Vocational School of Sivas, Sivas Cumhuriyet University, 58140, Sivas, Turkey

## Content of supplementary material

- Fig. S1** <sup>1</sup>H-NMR spectrum of (4R)-2-(2-hydroxyphenyl)thiazolidine-4-carboxylic acid.
- Fig. S2** <sup>1</sup>H-NMR spectrum of 2-(3-(3,4-dicyanophenoxy)phenyl)thiazolidine-4-carboxylic acid (**1**).
- Fig. S3** FTIR spectra of synthesized compounds (**1-4**).
- Fig. S4** UV-Vis spectra of ZnPc(**2**) at different concentrations in DMSO (inset: the plot of Q band absorbance versus concentration).
- Fig. S5** UV-Vis spectra of CoPc(**4**) at different concentrations in DMSO (inset: the plot of Q band absorbance versus concentration).
- Fig. S6** UV-Vis spectra of ZnPc (**2**) in different solvents (inset: The plot of the Q band frequency of ZnPc (**2**) against  $(n^2 - 1)/(2n^2 + 1)$ )
- Fig. S7** UV-Vis spectra of CoPc (**4**) in different solvents (inset: The plot of the Q band frequency of CoPc (**4**) against  $(n^2 - 1)/(2n^2 + 1)$ )
- Fig. S8** UV-Vis spectra of ZnPc (**2**) during the titration with Ag(I) ions (Inset: the plot of Q-, B-, and J-aggregation bands absorption values versus the amount of Ag(I) ions).
- Fig. S9** UV-Vis spectra of CoPc (**4**) during the titration with Ag(I) ions (Inset: the plot of Q and B bands absorption values versus the amount of Ag(I) ions).

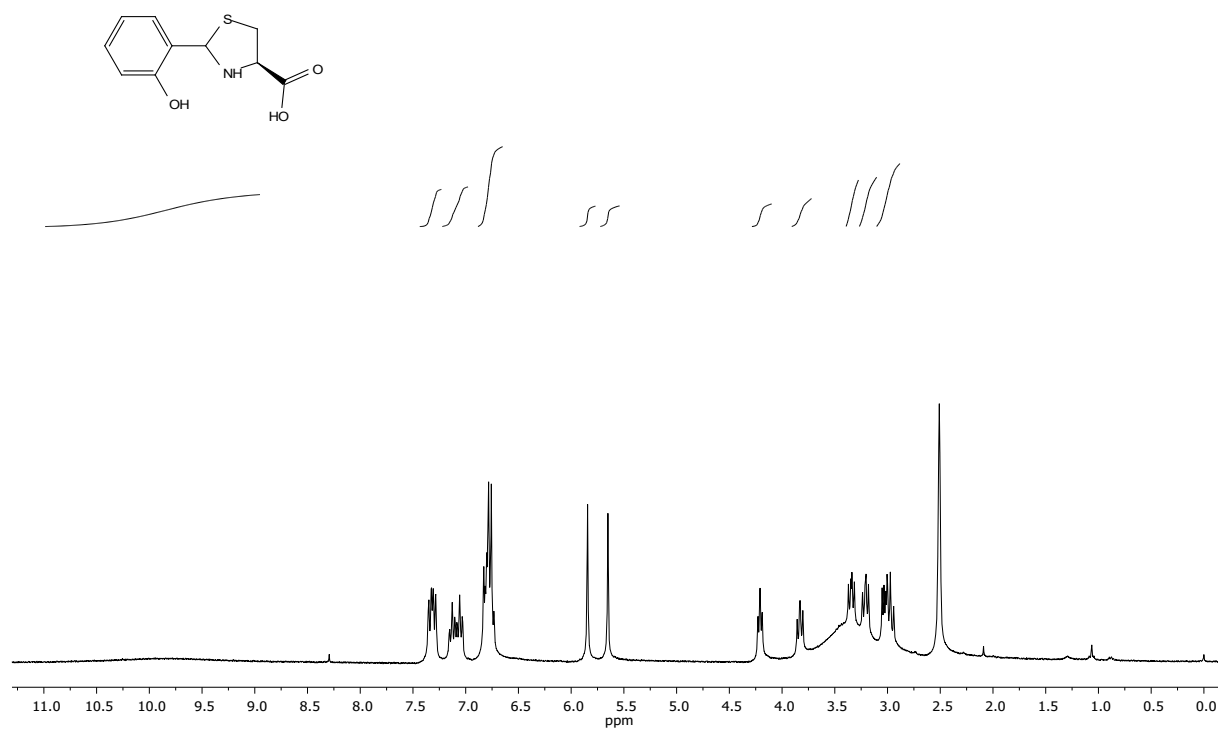

**Fig. S1** <sup>1</sup>H-NMR spectrum of (4R)-2-(2-hydroxyphenyl)thiazolidine-4-carboxylic acid.

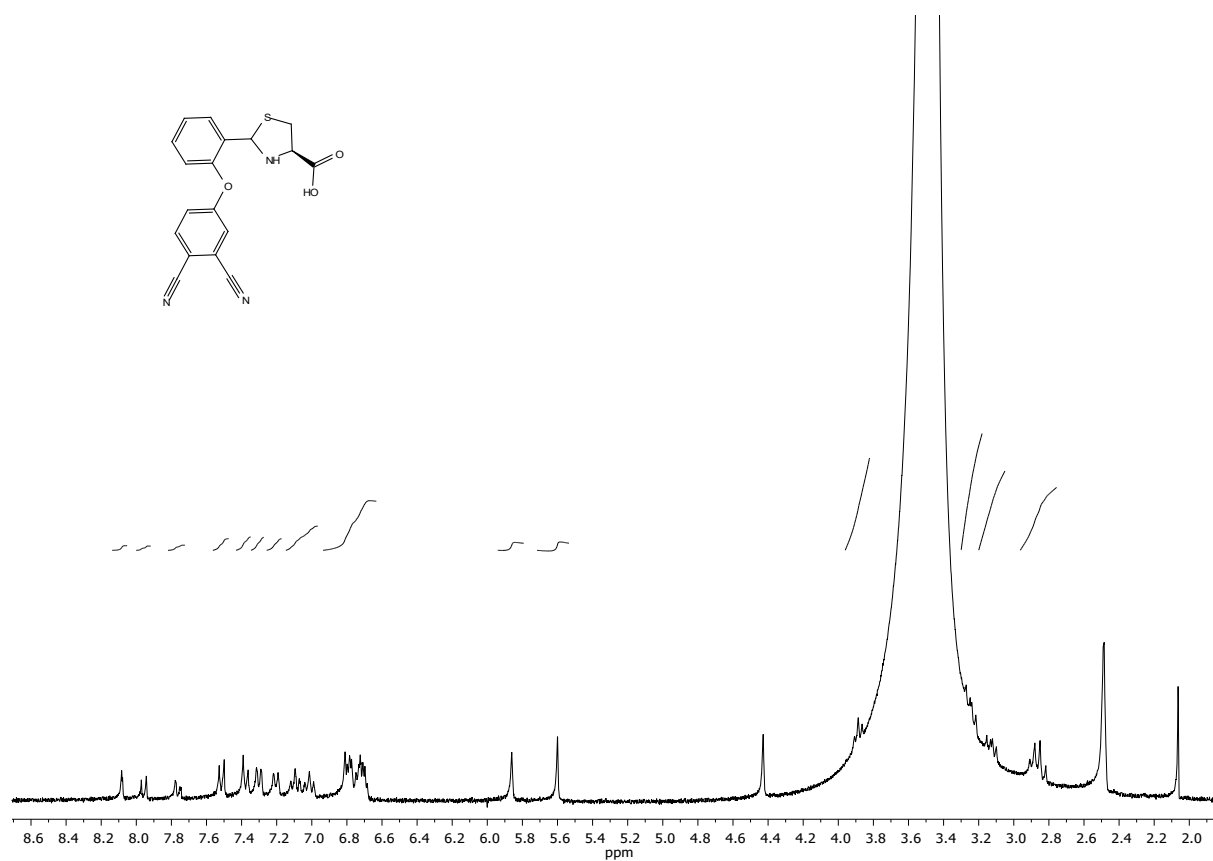

**Fig. S2** <sup>1</sup>H-NMR spectrum of 2-(3-(3,4-dicyanophenoxy)phenyl)thiazolidine-4-carboxylic acid (**1**).

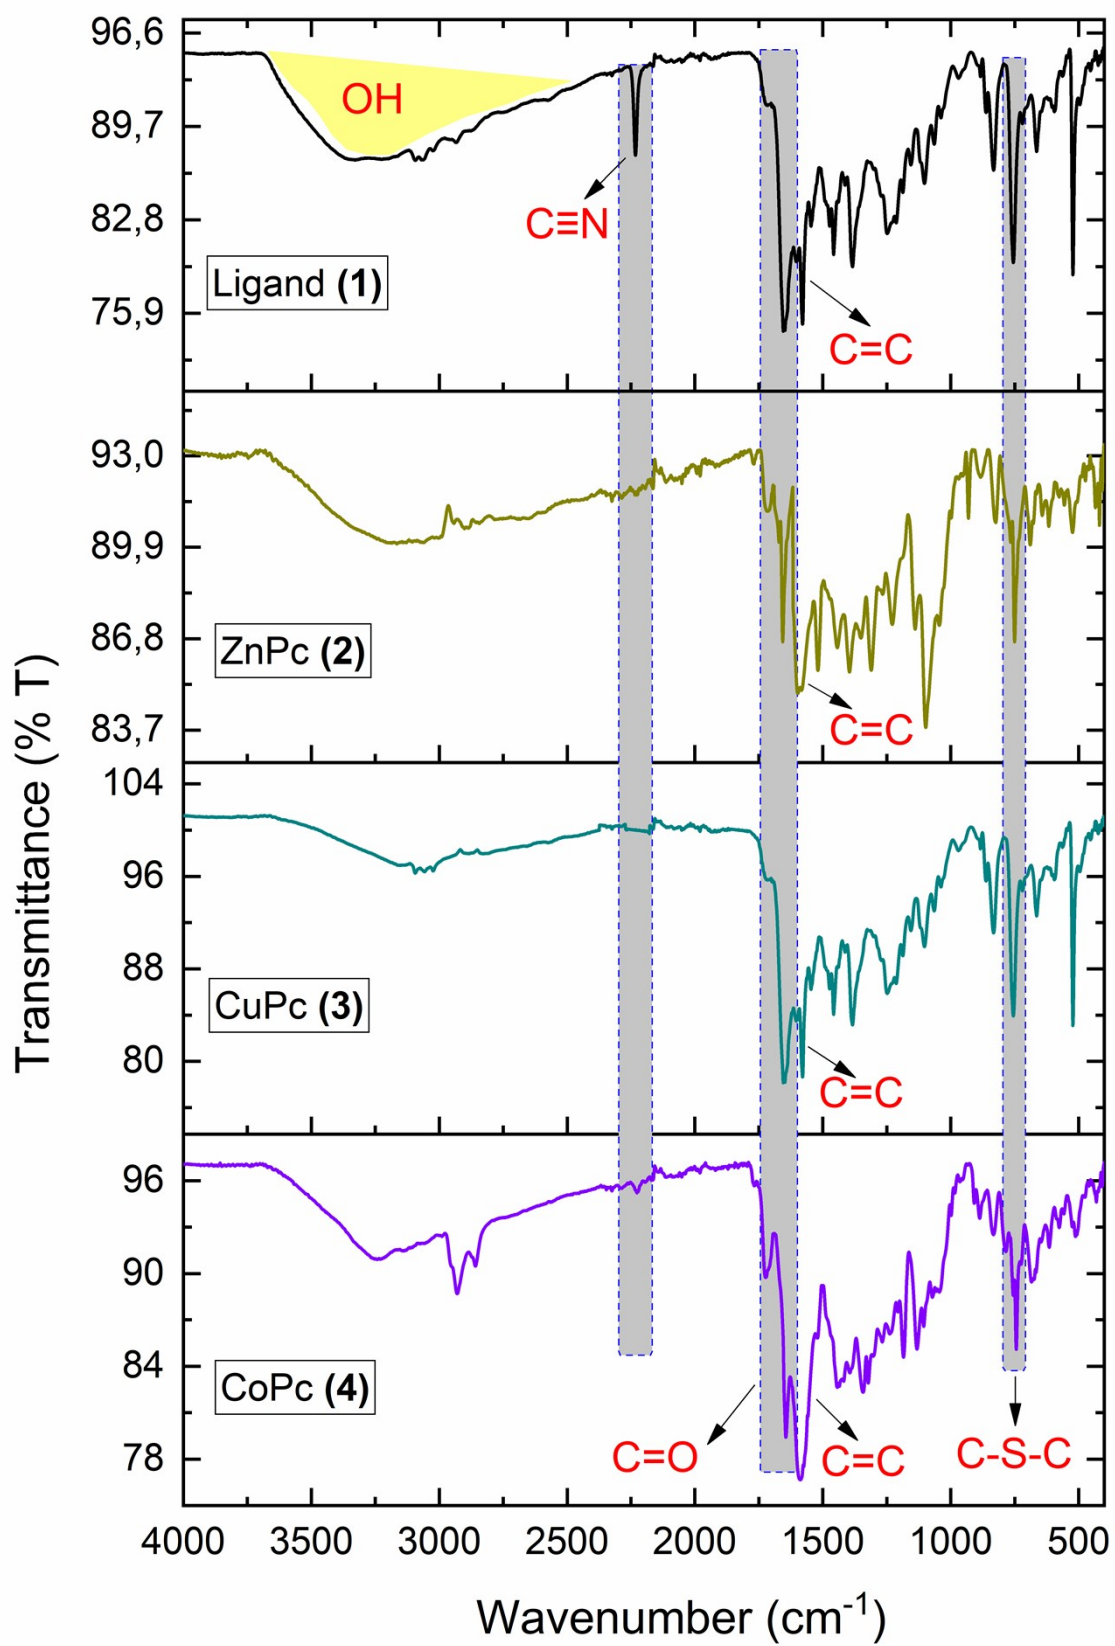

Fig. S3 FTIR spectra of synthesized compounds (1-4).

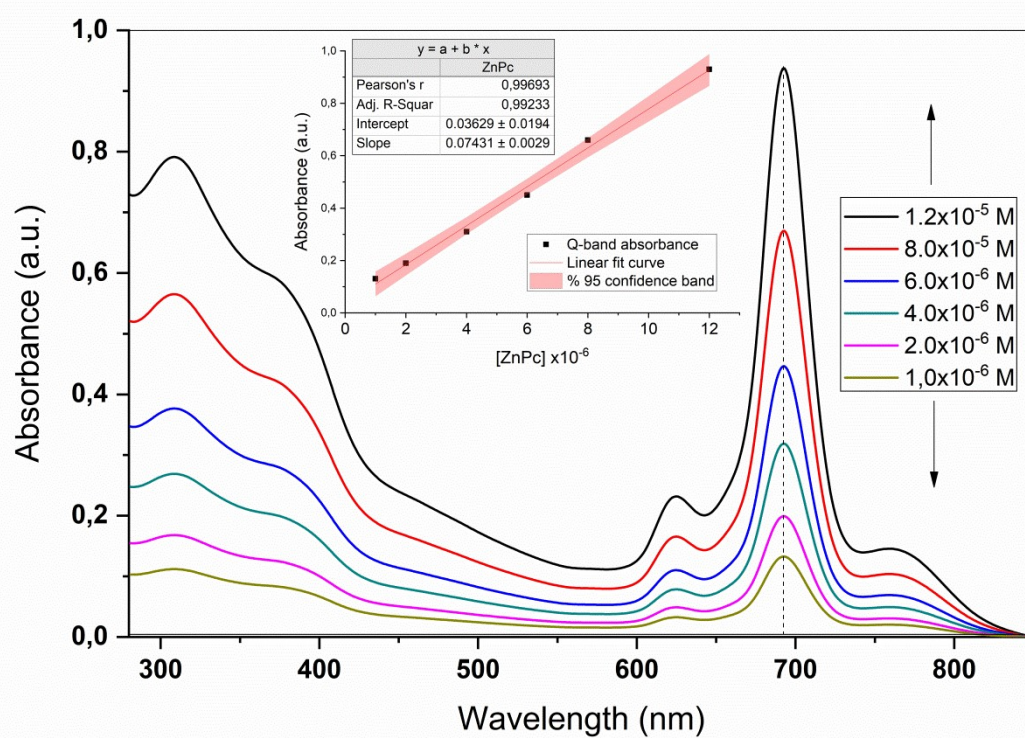

**Fig. S4** UV-Vis spectra of ZnPc (**2**) at different concentration in DMSO (inset: the plot of Q band absorbance versus concentration).

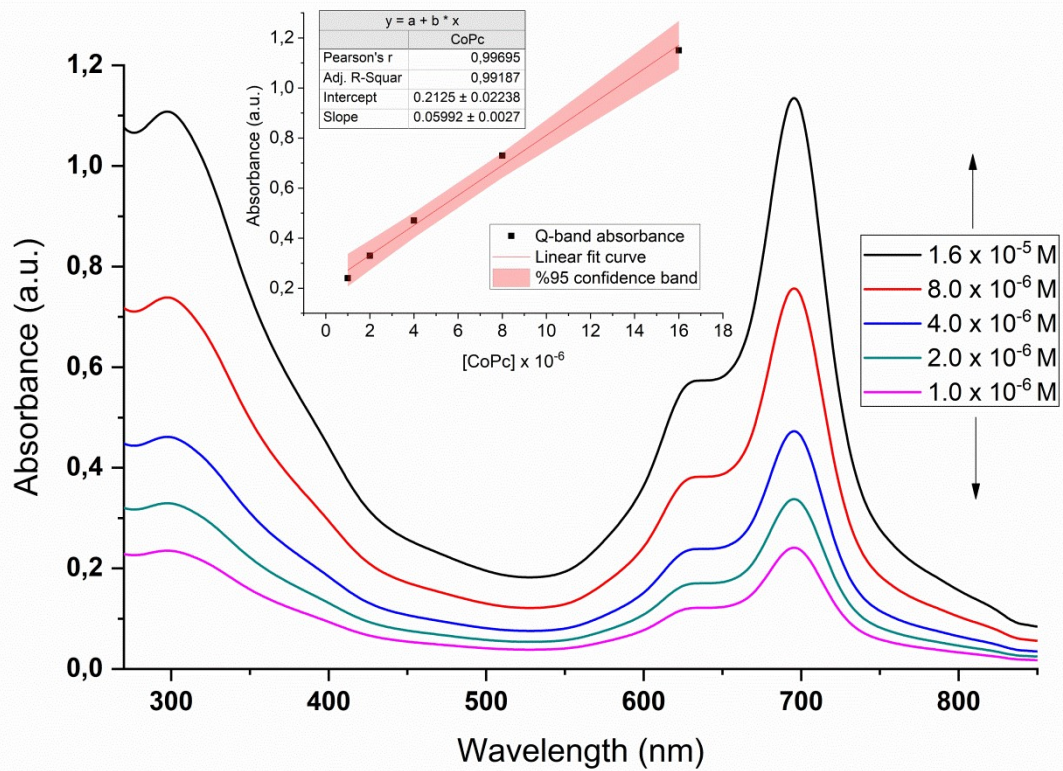

**Fig. S5** UV-Vis spectra of CoPc (**4**) at different concentration in DMSO (inset: the plot of Q band absorbance versus concentration).

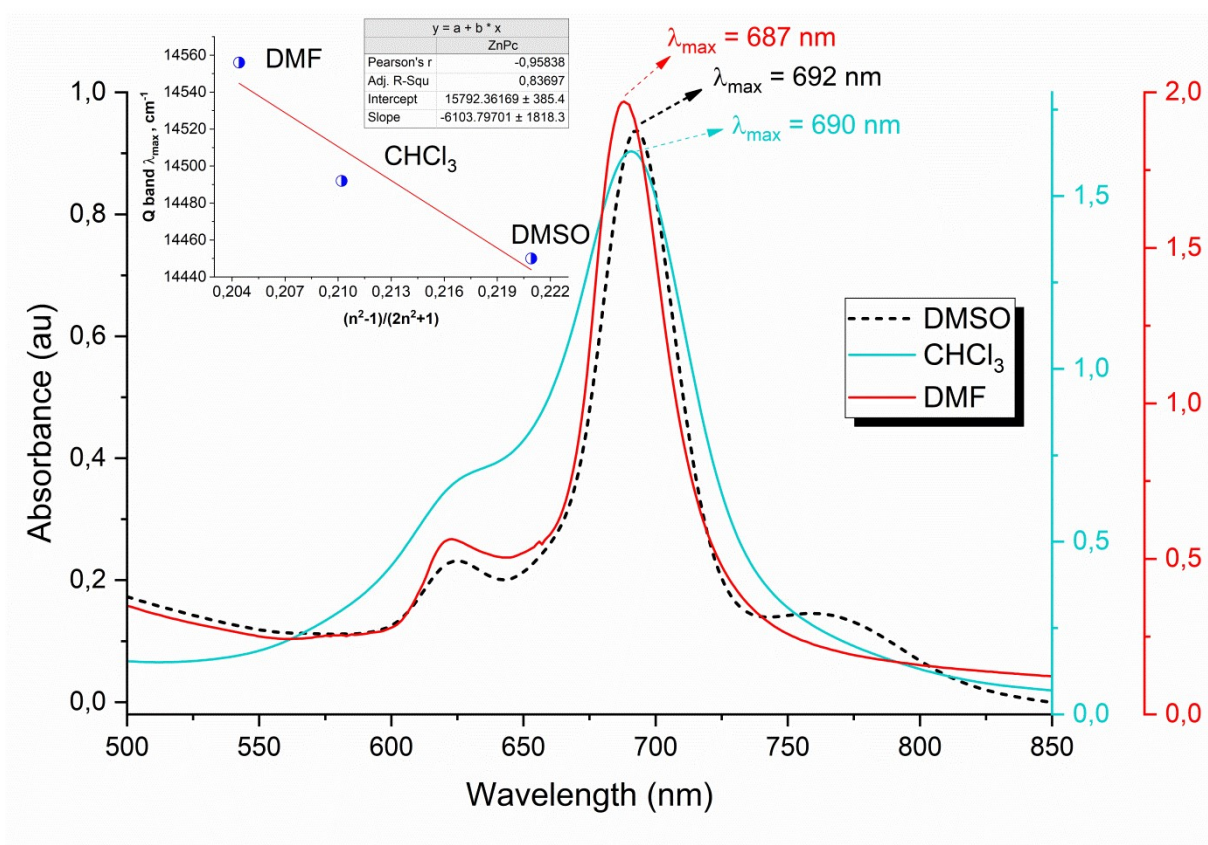

**Fig. S6.** UV-Vis spectra of ZnPc (**2**) in different solvents (inset: The plot of the Q band frequency of ZnPc (**2**) against  $(n^2 - 1)/(2n^2 + 1)$ )

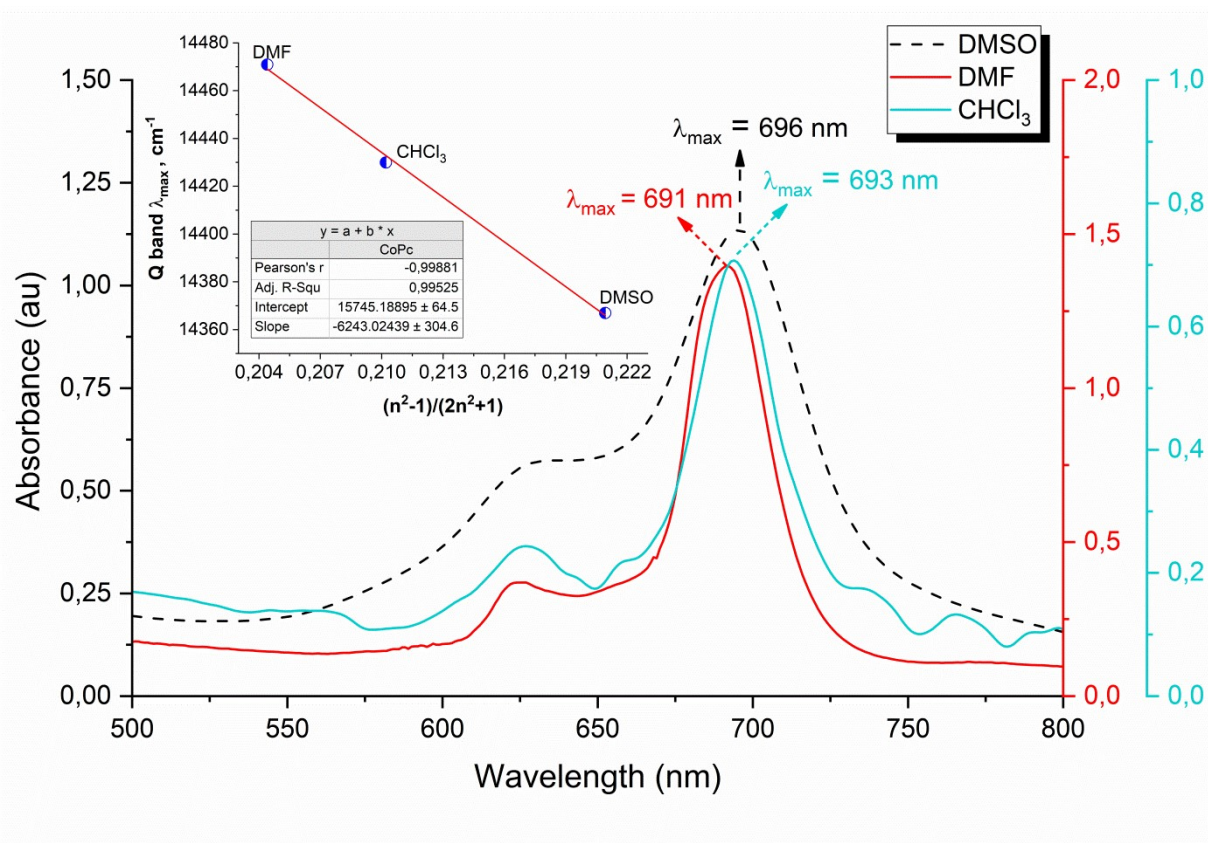

**Fig. S7.** UV-Vis spectra of CoPc (**4**) in different solvents (inset: The plot of the Q band frequency of CoPc (**4**) against  $(n^2 - 1)/(2n^2 + 1)$ )



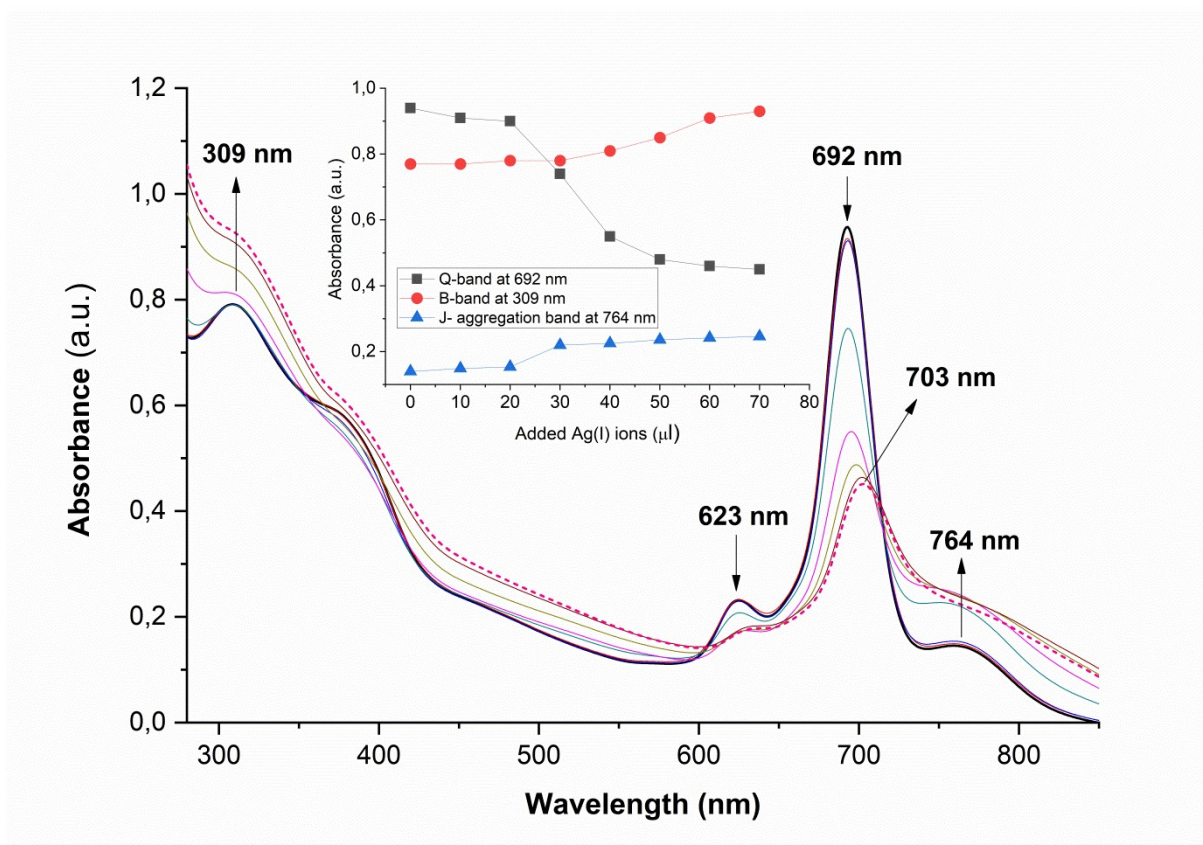

**Fig. S8** UV-Vis spectra of ZnPc (**2**) during the titration with Ag(I) ions (Inset: the plot of Q-, B- and J-aggregation bands absorption values versus the amount of Ag(I) ions).

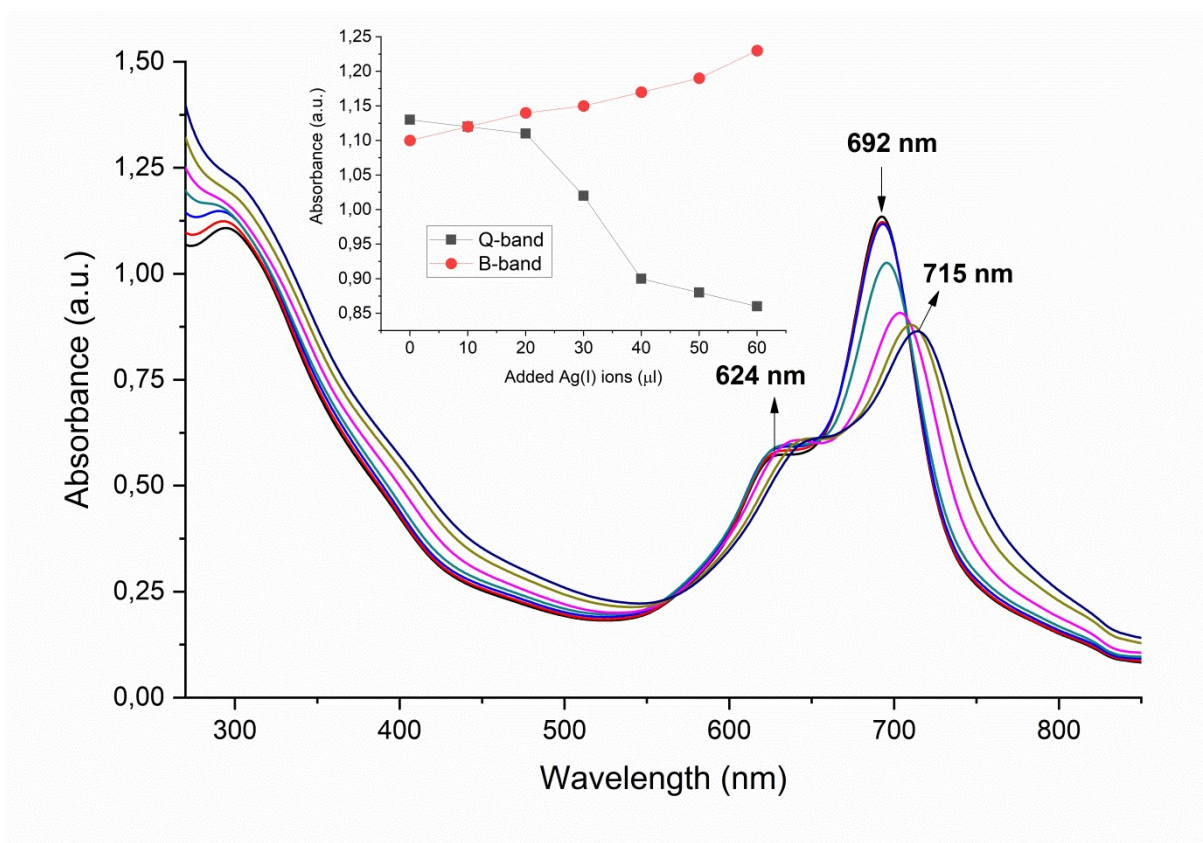

**Fig. S9** UV-Vis spectra of CoPc (**4**) during the titration with Ag(I) ions (Inset: the plot of Q and B bands absorption values versus the amount of Ag(I) ions).
